# Supplementary material
Source: PubMed Central journal article supplement (PMC2648082)
Supplement: tpc.108.061887_1.pdf [file tpc.108.061887_1.pdf]

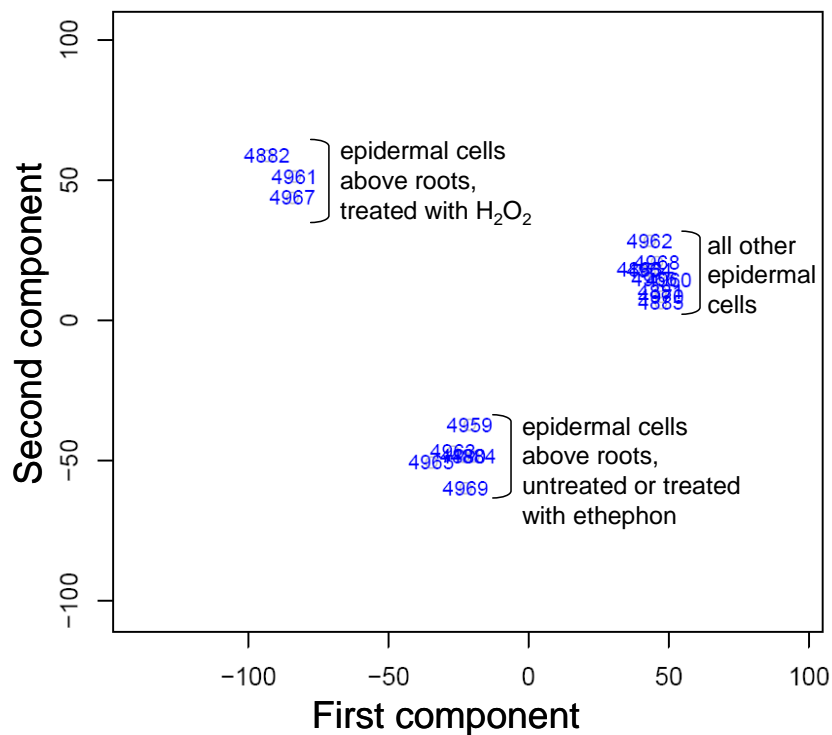

**Supplemental Figure 1. Principal components analysis of RMA expression values.**

Components analysis shows that the main difference between the expression values of the different microarray hybridizations is attributable to differential gene expression between the two tissues and the three different treatments. This can be seen from the separation of arrays with epidermal cells above roots (Hyb-IDs 4884, 4963, 4969 for untreated controls, 4880, 4959, 4965 for ethephon-treated cells and 4882, 4961, 4967 for H<sub>2</sub>O<sub>2</sub>-treated cells) from control epidermal cell arrays (Hyb-IDs 4885, 4964, 4970 for untreated controls, 4881, 4960, 4966 for ethephon-treated cells, and 4883, 4962, 4968 for H<sub>2</sub>O<sub>2</sub>-treated cells).

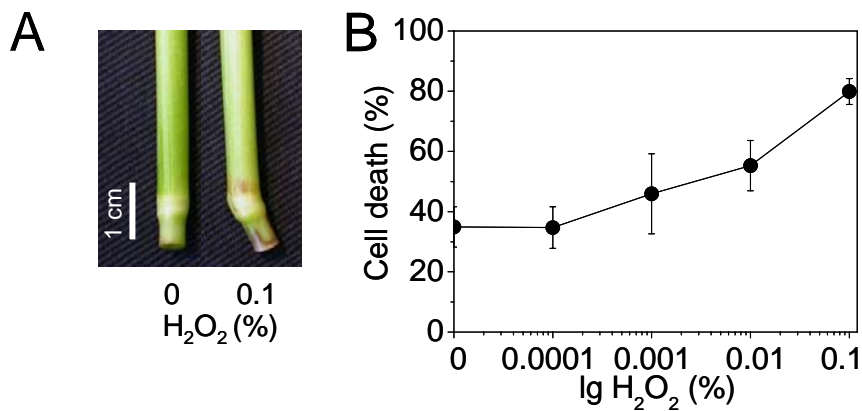

**Supplemental Figure 2. H<sub>2</sub>O<sub>2</sub> Induces Death of Epidermal Cells Above Adventitious Roots in cv Kinmaze.**

**(A)** Rice cv Kinmaze stem sections were treated with or without 0.1% (v/v) H<sub>2</sub>O<sub>2</sub> for 26 h.

**(B)** Epidermal cell death in rice cv Kinmaze is induced by H<sub>2</sub>O<sub>2</sub> in a dose-dependent manner. Stem sections were treated with 0.0001% (v/v) to 0.1% (v/v) H<sub>2</sub>O<sub>2</sub> or without effector for 26 h. Dead cells were visualized using Evans Blue. Results are averages ( $\pm$  SE) from 6 to 19 stem sections analyzed per treatment. The cell death rate induced with 0.1% (v/v) H<sub>2</sub>O<sub>2</sub> was significantly different from the control at  $P < 0.001$  (Tukey-test).

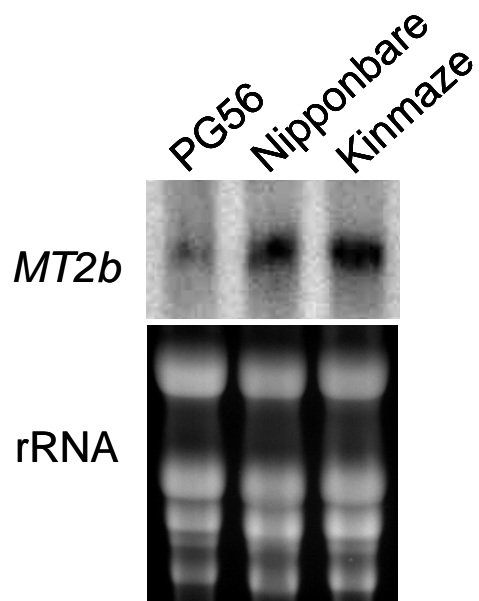

**Supplemental Figure 3. *MT2b* Transcript Levels in Rice Cultivars PG56, Nipponbare and Kinmaze.**

Northern analysis of *MT2b* expression was performed on total RNA isolated from the second youngest leaf of 11-week-old plants from rice cultivars Pin Gaew 56 (PG56), Nipponbare and Kinmaze. As a control for RNA loading, ribosomal RNA was stained with ethidium bromide.

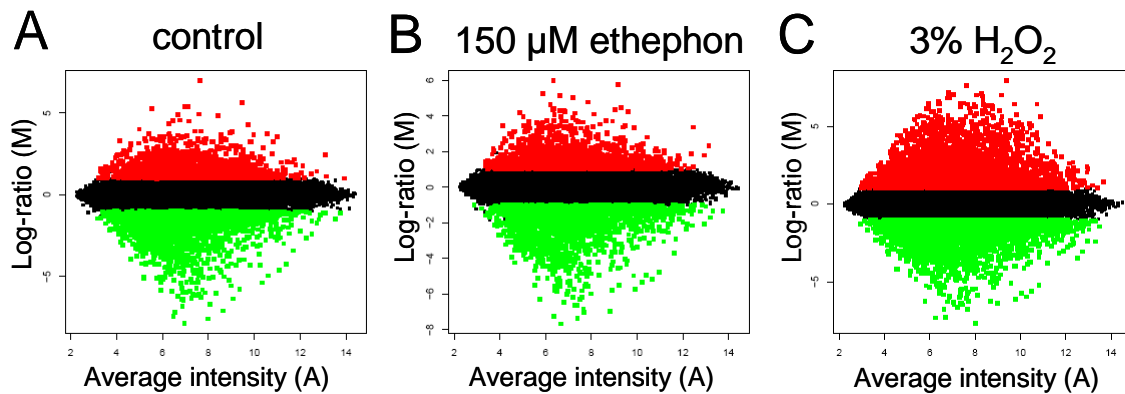

**Supplemental Figure 4. MA plots of genes with altered expression in epidermal cells above roots as compared to control epidermal cells.**

Genes that are expressed differentially in epidermal cells above roots as compared to control epidermal cells in (A) untreated stem sections, (B) in stem sections treated with 150  $\mu\text{M}$  ethephon for 4 h or (C) in stem sections treated with 3% (v/v)  $\text{H}_2\text{O}_2$  for 4 h. Regulated genes have large M values in the MA plot. The M values on the vertical axis represent differential expression. Red dots represent up-regulated and green dots represent down-regulated genes. The  $P$  value is  $P < 0.05$  and  $\log_2$ -ratio is  $> 1$  for up- and  $< -1$  for down-regulated genes. The A values on the horizontal axis represent average expression over all of the microarrays. (A) In untreated plants 1365 genes are up- and 2143 genes are down-regulated in epidermal cells above adventitious roots as compared to other epidermal cells. (B) In ethephon-treated plants 1565 genes are up- and 2122 genes are down-regulated. (C) In  $\text{H}_2\text{O}_2$ -treated plants 2841 genes are up- and 3601 genes are down-regulated.

**Supplemental Table 1. Genes regulated by ethylene and H<sub>2</sub>O<sub>2</sub>.**

Differentially expressed genes with a minimum fold change (FCh) of 2 at  $P < 0.001$  are shown.

| <b>Gene Name</b>                           | <b>FCh<br/>E</b> | <b>FCh<br/>H<sub>2</sub>O<sub>2</sub></b> | <b>Putative Functions</b>                                     |
|--------------------------------------------|------------------|-------------------------------------------|---------------------------------------------------------------|
| <b>Stress-Related</b>                      |                  |                                           |                                                               |
| Os01g0528800                               | ↑ 2.0            | 6.4                                       | CAD, cinnamyl alcohol dehydrogenase                           |
| Os01g0847700                               | ↑ 2.3            | 2.5                                       | aldose reductase                                              |
| Os04g0346800                               | ↑ 2.8            | 2.2                                       | MazG RS21-C6 family protein, NTP-pyrophosphorylase            |
| Os06g0103200                               | ↑ 2.8            | 6.5                                       | transferase                                                   |
| Os01g0124400                               | ↑ 3.5            | 2.0                                       | BBI3-3, Bowman-Birk type Ser protease inhibitor               |
| Os10g0567000                               | ↑ 2.3            | 6.7                                       | crcB-like protein                                             |
| Os01g0941800                               | ↓ 0.3            | 0.3                                       | PAP, purple acid phosphatase 16-like                          |
| Os05g0111300                               | ↓ 0.4            | 0.2                                       | MT2b, metallothionein                                         |
| Os10g0547200                               | ↓ 0.4            | 0.4                                       | harpin-induced protein-related                                |
| <b>Ethylene Synthesis</b>                  |                  |                                           |                                                               |
| Os03g0860600                               | ↑ 2.3            | 2.3                                       | <i>ACO1</i>                                                   |
| Os11g0585900                               | ↓ 0.5            | 0.4                                       | <i>EOL1</i> (ETO1-like)                                       |
| <b>Signaling and Transcription Factors</b> |                  |                                           |                                                               |
| Os08g0201700                               | ↑ 2.2            | 5.4                                       | LRR kinase, leucine-rich repeat kinase                        |
| Os02g0614300                               | ↑ 2.3            | 2.5                                       | ANT-like AP2/ERF family transcription factor                  |
| Os01g0693400                               | ↓ 0.4            | 0.5                                       | RAV-like AP2/ERF family transcription factor                  |
| Os01g0192300                               | ↓ 0.4            | 0.3                                       | myb family transcription factor                               |
| Os01g0227200                               | ↓ 0.5            | 0.4                                       | PERK1, putative proline-rich, extensin-like receptor kinase 1 |
| Os01g0670800                               | ↓ 0.5            | 0.3                                       | ARF2 transcription factor                                     |
| Os01g0753500                               | ↓ 0.3            | 0.4                                       | ARF3 transcription factor                                     |
| Os10g0480200                               | ↓ 0.4            | 0.4                                       | Hox9 homeodomain leucine zipper                               |

|              |       |     |                                                          |
|--------------|-------|-----|----------------------------------------------------------|
|              |       |     | transcription factor                                     |
| Os01g0855900 | ↓ 0.4 | 0.4 | CDC6, contains FAR1 DNA-binding domain                   |
| Os01g0107400 | ↓ 0.5 | 0.2 | HT1-like Ser/Thr kinase, high leaf temperature protein 1 |
| Os04g0683600 | ↓ 0.5 | 0.2 | protein kinase                                           |

### **Protein Metabolism**

|              |       |     |                                                                                            |
|--------------|-------|-----|--------------------------------------------------------------------------------------------|
| Os03g0353400 | ↓ 0.4 | 0.5 | ERD15-like, poly(A)-binding protein C-terminal interacting protein                         |
| Os04g0530500 | ↓ 0.5 | 0.3 | specialized type of Zn-finger RING domain containing protein, putative E3 ubiquitin ligase |
| Os10g0126000 | ↓ 0.5 | 0.4 | F-box family protein                                                                       |

### **Transport**

|              |       |     |                                                                |
|--------------|-------|-----|----------------------------------------------------------------|
| Os05g0567700 | ↑ 2.3 | 2.3 | MFS, major facilitator superfamily, sugar transporter          |
| Os02g0695800 | ↑ 2.3 | 2.3 | OPT4-like, oligopeptide transporter (OPT family)               |
| Os02g0633300 | ↓ 0.5 | 0.4 | YS (yellow stripe)-like, oligopeptide transporter (OPT family) |
| Os10g0554200 | ↓ 0.4 | 0.1 | NRT1.1-like, nitrate or peptide transporter (PTR family)       |
| Os02g0184200 | ↓ 0.5 | 0.4 | AVP1, vacuolar H <sup>+</sup> -PPase                           |
| Os10g0561300 | ↓ 0.5 | 0.4 | HEX6, hexose carrier protein                                   |

### **Metabolism**

|              |       |     |                                     |
|--------------|-------|-----|-------------------------------------|
| Os05g0408300 | ↓ 0.5 | 0.4 | lipase                              |
| Os05g0580000 | ↓ 0.3 | 0.3 | ADP-glucose synthase, large subunit |
| Os08g0162800 | ↓ 0.4 | 0.5 | ACBP, acyl-CoA-binding protein      |

### **Others**

|              |       |     |                      |
|--------------|-------|-----|----------------------|
| Os01g0928100 | ↑ 2.1 | 4.3 | hypothetical protein |
|--------------|-------|-----|----------------------|

|                  |   |     |     |                                                               |
|------------------|---|-----|-----|---------------------------------------------------------------|
| Os04g0616800     | ↑ | 2.2 | 2.6 | hypothetical protein                                          |
| Os05g0165500     | ↑ | 2.2 | 2.1 | hypothetical protein                                          |
| Os09g0515300     | ↑ | 2.2 | 2.0 | hypothetical protein                                          |
| Os11g0502700     | ↑ | 2.6 | 2.9 | hypothetical protein                                          |
| Os04g0101400     | ↑ | 2.0 | 4.0 | cytochrome P450 93A2, putative                                |
| Os07g0682000     | ↑ | 2.1 | 2.3 | protein of unknown function, no conserved domain              |
| Os12g0145400     | ↓ | 0.5 | 0.4 | DUF231 domain protein of unknown function                     |
| Os04g0203100     | ↓ | 0.4 | 0.4 | DUF239 domain protein of unknown function                     |
| Os01g0565800     | ↓ | 0.4 | 0.5 | DUF538 family protein of unknown function                     |
| Os01g0913100     | ↓ | 0.4 | 0.4 | DUF538 family protein of unknown function                     |
| Os03g0858600     | ↓ | 0.4 | 0.5 | DUF668 family protein of unknown function                     |
| Os02g0614600     | ↓ | 0.4 | 0.5 | DUF869 family protein of unknown function                     |
| Os02g0107600     | ↓ | 0.4 | 0.5 | DUF1668 family protein of unknown function                    |
| Os03g0157300     | ↓ | 0.4 | 0.3 | DUF614 Cys-rich domain containing protein of unknown function |
| Os01g0584100     | ↓ | 0.5 | 0.1 | hypothetical protein                                          |
| Os01g0914000     | ↓ | 0.5 | 0.4 | hypothetical protein                                          |
| Os02g0441000     | ↓ | 0.4 | 0.3 | hypothetical protein                                          |
| Os04g0600500     | ↓ | 0.5 | 0.5 | hypothetical protein                                          |
| OSJNBa0015J03.15 | ↓ | 0.4 | 0.5 | hypothetical protein                                          |
| Os07g0100900     | ↓ | 0.5 | 0.2 | unknown protein, no conserved domains                         |
| Os01g0719400     | ↓ | 0.5 | 0.5 | Barentsz domain containing protein of unknown function        |
| Os04g0579700     | ↓ | 0.4 | 0.4 | prolactin-interacting factor-related protein                  |
| Os05g0550000     | ↓ | 0.5 | 0.4 | Zn-finger, RING domain protein                                |
| Os07g0159900     | ↓ | 0.4 | 0.5 | glutaredoxin domain-containing protein                        |
| Os07g0499800     | ↓ | 0.3 | 0.3 | Zn-finger, RING domain protein                                |
| Os12g0572500     | ↓ | 0.5 | 0.4 | XH domain containing protein, unknown function                |

**Supplemental Table 2. Time-course of ethephon-induced epidermal cell death in cv Kinmaze.**

Stem sections of rice cv Kinmaze were treated with or without 150  $\mu$ M ethephon for up to 48 h. Dead epidermal cells were visualized with Evans Blue. Results are averages ( $\pm$  SE) from a minimum of 5 stem sections analyzed per treatment. Cell death rates were significantly elevated after treatment with 150  $\mu$ M ethephon for 26 h and 48 h ( $P < 0.05$ ; Tukey-test).

| <b>Time [h]</b> | <b>Cell death rate (%) of control treatment</b> | <b>Cell death rate (%) of ethephon treatment</b> |
|-----------------|-------------------------------------------------|--------------------------------------------------|
| <b>0</b>        | <b>20.7 (<math>\pm</math> 7.2)</b>              | <b>-</b>                                         |
| <b>6</b>        | <b>14.9 (<math>\pm</math> 1.9)</b>              | <b>35.1 (<math>\pm</math> 13.8)</b>              |
| <b>18</b>       | <b>27.7 (<math>\pm</math> 7.0)</b>              | <b>44.7 (<math>\pm</math> 5.9)</b>               |
| <b>26</b>       | <b>22.0 (<math>\pm</math> 4.3)</b>              | <b>47.7 (<math>\pm</math> 5.7)</b>               |
| <b>48</b>       | <b>46.1 (<math>\pm</math> 11.7)</b>             | <b>88.8 (<math>\pm</math> 5.4)</b>               |
